# Supplementary material for: DNA methylation signature of human fetal alcohol spectrum disorder
Source: Epigenetics Chromatin. 2016 Jun 29;9:25. doi: 10.1186/s13072-016-0074-4 (PMC4926300; doi:10.1186/s13072-016-0074-4)
Supplement: Supplementary file 6 — 10.1186/s13072-016-0074-4 Table of imprinted genes in humans. [file 13072_2016_74_MOESM6_ESM.xlsx]

## Sheet: geneimprint_imprinted_human_gen
Gene	Aliases	Location	Status	Expressed Allele
DIRAS3	ARHI, NOEY2	1p31 AS	Imprinted	Paternal
RNU5D-1	U5DL, U5DS, RNU5D	1p34.1 AS	Imprinted	Paternal
TP73	P73	1p36.3	Imprinted	Maternal
LRRTM1		2p12 AS	Imprinted	Paternal
GPR1		2q33.3 AS	Imprinted	Paternal
ZDBF2		2q33.3	Imprinted	Paternal
NAP1L5	DRLM	4q22.1 AS	Imprinted	Paternal
FAM50B	X5L, D6S2654E	6p25.2	Imprinted	Paternal
AIM1	ST4, CRYBG1	6q21	Imprinted	Paternal
LIN28B	CSDD2	6q21	Imprinted	Paternal
PLAGL1	ZAC, LOT1, ZAC1, MGC126275, MGC126276, DKFZp781P1017	6q24-q25 AS	Imprinted	Paternal
HYMAI	NCRNA00020	6q24.2 AS	Imprinted	Paternal
SLC22A2*	OCT2, MGC32628	6q26 AS	Imprinted	Maternal
IGF2R	MPR1, MPRI, CD222, CIMPR, M6P-R	6q26	Imprinted	Biallelic
SLC22A3*	EMT, EMTH, OCT3	6q26-q27	Imprinted	Maternal
GRB10	RSS, IRBP, MEG1, GRB-IR, Grb-10, KIAA0207	7p12-p11.2 AS	Imprinted	Isoform Dependent
DDC	AADC	7p12.2 AS	Imprinted	Isoform Dependent
MAGI2	AIP1, AIP-1, ARIP1, SSCAM, MAGI-2, ACVRIP1	7q21 AS	Imprinted	Maternal
PEG10	EDR, HB-1, Mar2, MEF3L, Mart2, RGAG3	7q21	Imprinted	Paternal
SGCE	ESG, DYT11	7q21-q22 AS	Imprinted	Paternal
PPP1R9A	NRB1, NRBI, FLJ20068, KIAA1222, Neurabin-I	7q21.3	Imprinted	Maternal
DLX5		7q22 AS	Imprinted	Maternal
TFPI2	PP5, REF1, TFPI-2, FLJ21164	7q22 AS	Imprinted	Maternal
COPG2IT1	CIT1, COPG2AS, FLJ41646, NCRNA00170, DKFZP761N09121	7q32	Imprinted	Paternal
CPA4	CPA3	7q32	Imprinted	Maternal
MEST	PEG1, MGC8703, MGC111102, DKFZp686L18234	7q32	Imprinted	Paternal
MESTIT1	MEST-IT, PEG1-AS, MEST-AS1, MEST-IT1, NCRNA00040	7q32.2 AS	Imprinted	Paternal
KLF14	BTEB5	7q32.3 AS	Imprinted	Maternal
DLGAP2	DAP2, SAPAP2	8p23	Imprinted	Paternal
KCNK9	KT3.2, TASK3, K2p9.1, TASK-3, MGC138268, MGC138270	8q24.3 AS	Imprinted	Maternal
ZFAT-AS1	ZFATAS, ZFAT-AS, SAS-ZFAT, NCRNA00070	8q24.22	Imprinted	Paternal
ZFAT	AITD3, ZFAT1, ZNF406	8q24.22 AS	Imprinted	Paternal
GLIS3	ZNF515	9p24.2 AS	Imprinted	Paternal
INPP5F V2	SAC2, hSAC2, MSTP007, MSTPO47, FLJ13081, KIAA0966, MGC59773, MGC131851	10q26.11	Imprinted	Paternal
WT1-Alt trans	WT1, GUD, WAGR, WT33, WIT-2	11p13 AS	Imprinted	Paternal
KCNQ1OT1	LIT1, KvDMR1, KCNQ10T1, KvLQT1-AS, long QT intronic transcript 1	11p15	Imprinted	Paternal
KCNQ1DN	BWRT, HSA404617	11p15.4	Imprinted	Maternal
OSBPL5	ORP5, OBPH1, FLJ42929	11p15.4 AS	Imprinted	Maternal
IGF2	INSIGF, pp9974, C11orf43, FLJ22066, FLJ44734	11p15.5 AS	Imprinted	Paternal
IGF2AS	PEG8, MGC168198	11p15.5	Imprinted	Paternal
PHLDA2	IPL, BRW1C, BWR1C, HLDA2, TSSC3	11p15.5 AS	Imprinted	Maternal
CDKN1C	BWS, WBS, p57, BWCR, KIP2	11p15.5 AS	Imprinted	Maternal
KCNQ1	LQT, RWS, WRS, LQT1, SQT2, ATFB1, ATFB3, JLNS1, KCNA8, KCNA9, Kv1.9, Kv7.1, KVLQT1, FLJ26167	11p15.5	Imprinted	Maternal
H19	ASM, BWS, ASM1, MGC4485, PRO2605, D11S813E	11p15.5 AS	Imprinted	Maternal
SLC22A18	HET, ITM, BWR1A, IMPT1, TSSC5, ORCTL2, BWSCR1A, SLC22A1L, p45-BWR1A, DKFZp667A184	11p15.5	Imprinted	Maternal
INS	ILPR, IRDN	11p15.5 AS	Imprinted	Paternal
ANO1	DOG1, TAOS2, ORAOV2, TMEM16A	11q13.3	Imprinted	Maternal
ZC3H12C	MCPIP3	11q22.3	Imprinted	Paternal
NTM	HNT, NTRI, IGLON2	11q25	Imprinted	Maternal
RBP5	CRBP3, CRBPIII, CRBP-III	12p13.31 AS	Imprinted	Maternal
RB1	RB, pRb, OSRC, pp110, p105-Rb	13q14.2	Imprinted	Maternal
DLK1	DLK, FA1, ZOG, pG2, PREF1, Pref-1	14q32	Imprinted	Paternal
MEG3	GTL2, FP504, prebp1, PRO0518, PRO2160, FLJ31163, FLJ42589	14q32	Imprinted	Maternal
RTL1	MART1, PEG11, LOC388015	14q32.31 AS	Imprinted	Paternal
MEG8	Rian	14q32.31	Imprinted	Maternal
MAGEL2	nM15, NDNL1	15q11-q12 AS	Imprinted	Paternal
NPAP1	C15orf2	15q11-q13	Imprinted	Unknown
UBE3A	AS, ANCR, E6-AP, HPVE6A, EPVE6AP, FLJ26981	15q11-q13 AS	Imprinted	Maternal
MKRN3	D15S9, RNF63, ZFP127, ZNF127, MGC88288	15q11-q13	Imprinted	Paternal
PWCR1	PET1, non-coding RNA in the Prader-Willi critical region	15q11.2	Imprinted	Paternal
SNORD108	HBII-437, HBII-437 C/D box snoRNA	15q11.2	Imprinted	Paternal
SNORD107	HBII-436, HBII-436 C/D box snoRNA	15q11.2	Imprinted	Paternal
SNORD116@	PET1, PWCR1, HBII-85	15q11.2	Imprinted	Paternal
SNRPN	SMN, PWCR, SM-D, RT-LI, HCERN3, SNRNP-N, FLJ33569, FLJ36996, FLJ39265, MGC29886, SNURF-SNRPN, DKFZp762N022, DKFZp686C0927, DKFZp761I1912, DKFZp686M12165	15q11.2	Imprinted	Paternal
ATP10A	ATPVA, ATPVC, ATP10C, KIAA0566	15q11.2 AS	Imprinted	Maternal
SNORD115@	HBII-52	15q11.2	Imprinted	Paternal
SNORD115-48	HBII-52-48	15q11.2	Imprinted	Paternal
SNORD109B	HBII-438B, HBII-438B C/D box snoRNA	15q11.2	Imprinted	Paternal
SNORD109A	HBII-438A	15q11.2	Imprinted	Paternal
NDN	HsT16328	15q11.2-q12 AS	Imprinted	Paternal
SNURF		15q12	Imprinted	Paternal
SNORD64	HBII-13, HBII-13 snoRNA	15q12	Imprinted	Paternal
ZNF597		16p13.3 AS	Imprinted	Maternal
NAA60	HAT4, NAT15	16p13.3	Imprinted	Maternal
TCEB3C	HsT829, TCEB3L2, Elongin A3	18q21.1 AS	Imprinted	Maternal
DNMT1	AIM, DNMT, MCMT, CXXC9, HSN1E, ADCADN	19p13.2 AS	Imprinted	Paternal
ZIM2	ZNF656	19q13.4 AS	Imprinted	Paternal
MIMT1	MIM1, LINC00067, NCRNA00067	19q13.4	Imprinted	Paternal
PEG3	PW1, ZNF904, ZSCAN24	19q13.4 AS	Imprinted	Paternal
MIR371A	C19MC, MIR371, MIRN371, hsa-mir-371, hsa-mir-371a	19q13.42	Imprinted	Paternal
NLRP2	NBS1, PAN1, NALP2, PYPAF2, CLR19.9	19q13.42	Imprinted	Maternal
PSIMCT-1		20q11.2	Imprinted	Paternal
BLCAP	BC10	20q11.2-q12 AS	Imprinted	Isoform Dependent
NNAT	Peg5	20q11.2-q12	Imprinted	Paternal
MCTS2		20q11.21	Imprinted	Paternal
GDAP1L1	dJ881L22.1, dJ995J12.1.1	20q12	Imprinted	Paternal
SGK2	H-SGK2, dJ138B7.2	20q13.2	Imprinted	Paternal
GNAS	AHO, GSA, GSP, POH, GPSA, NESP, GNAS1, PHP1A, PHP1B, C20orf45, MGC33735, dJ309F20.1.1, dJ806M20.3.3	20q13.3	Imprinted	Isoform Dependent
L3MBTL	L3MBTL1, FLJ41181, KIAA0681, H-L(3)MBT, dJ138B7.3, DKFZp586P1522	20q13.12	Imprinted	Paternal
MIR296	MIRN296, miRNA296	20q13.32 AS	Imprinted	Paternal
MIR298	MIRN298, hsa-mir-298	20q13.32 AS	Imprinted	Paternal
SANG	SANG, Nespas	20q13.32	Imprinted	Paternal
GNASAS	SANG, NESPAS, GNAS1AS, NCRNA00075	20q13.32 AS	Imprinted	Paternal
DGCR6		22q11.21	Imprinted	Random
DGCR6L		22q11.21 AS	Imprinted	Random
